# Supplementary material for: Mismatch Repair Deficiency as a Predictive and Prognostic Biomarker in Molecularly Classified Endometrial Carcinoma
Source: MDPI journal article supplement (doi:10.3390/cancers13133124), 2021-06-22
Supplement: s1 [file cancers-1259917-supplementary.pdf › cancers-1259917-supplementary.pdf]

**Table S1.** Univariable Cox regression disease-specific survival analyses for MMR-D and NSMP endometrial carcinomas.

| Variable                        | MMR-D (n = 191) |                |        | NSMP (n = 218)  |                |        |
|---------------------------------|-----------------|----------------|--------|-----------------|----------------|--------|
|                                 | N               | HR (95% CI)    | P      | N               | HR (95% CI)    | p      |
| Age (continuous variable)       | 191             | 1.0 (0.98–1.0) | 0.835  | 218             | 1.1 (1.0–1.1)  | 0.025  |
| Stage II–IV                     | 63              | 4.4 (2.4–8.1)  | <0.001 | 53              | 5.3 (2.4–12)   | <0.001 |
| Histology                       |                 |                | 0.005  |                 |                | <0.001 |
| Endometrioid grade 1-2          | 133             | 1              |        | 193             | 1              |        |
| Endometrioid grade 3            | 41              | 2.7 (1.4–5.2)  | 0.003  | 13              | 14 (5.6–33)    | <0.001 |
| Nonendometrioid                 | 17              | 2.5 (1.0–6.2)  | 0.046  | 12              | 6.6 (2.2–20)   | 0.001  |
| Myometrial invasion $\geq 50\%$ | 89              | 3.7 (1.9–7.1)  | <0.001 | 83              | 5.7 (2.3–14)   | <0.001 |
| Cervical stromal invasion       | 42 <sup>1</sup> | 2.6 (1.4–4.8)  | 0.002  | 31              | 2.1 (0.83–5.2) | 0.121  |
| Tumor size >5 cm                | 49 <sup>2</sup> | 3.0 (1.6–5.5)  | 0.001  | 44 <sup>3</sup> | 3.8 (1.7–8.4)  | 0.001  |
| Lymphovascular space invasion   | 62              | 4.6 (2.5–8.4)  | <0.001 | 49              | 5.9 (2.7–13)   | <0.001 |
| Positive peritoneal cytology    | 10 <sup>4</sup> | 4.9 (2.0–12)   | <0.001 | 11 <sup>5</sup> | 21 (8.9–48)    | <0.001 |
| L1 cell adhesion molecule       | 17 <sup>1</sup> | 1.9 (0.81–4.5) | 0.138  | 14 <sup>6</sup> | 7.1 (2.8–18)   | <0.001 |

Abbreviations: CI, confidence interval; HR, hazard ratio; MMR-D, mismatch repair deficient; NSMP, no specific molecular profile.<sup>1</sup> Data missing for 1 patient; <sup>2</sup> data missing for 12 patients; <sup>3</sup> data missing for 16 patients; <sup>4</sup> data missing for 4 patients; <sup>5</sup> data missing for 3 patients; data missing for 8 patients.
